# Supplementary material for: Improvement of Uveal and Capsular Biocompatibility of Hydrophobic Acrylic Intraocular Lens by Surface Grafting with 2-Methacryloyloxyethyl Phosphorylcholine-Methacrylic Acid Copolymer
Source: Sci Rep. 2017 Jan 13;7:40462. doi: 10.1038/srep40462 (PMC5234006; doi:10.1038/srep40462)
Supplement: Supplementary Information [file srep40462-s1.pdf]

## ***Supplementary information***

### **Improvement of Uveal and Capsular Biocompatibility of Hydrophobic Acrylic Intraocular Lens by Surface Grafting with 2-Methacryloyloxyethyl Phosphorylcholine-Methacrylic Acid Copolymer**

Xuhua Tan <sup>1#</sup>, Jiezhao Zhan <sup>2,3 #</sup>, Yi Zhu <sup>1</sup>, Ji Cao <sup>3,5</sup>, Lin Wang <sup>2,3</sup>, Sa Liu <sup>2,3</sup>, Yingjun Wang <sup>2,3</sup>, Zhenzhen Liu <sup>1</sup>, Yingyan Qin, Mingxing Wu <sup>4\*</sup>, Yizhi Liu <sup>1\*</sup> & Li Ren <sup>2,3\*</sup>

<sup>1</sup> State Key Laboratory of Ophthalmology, Zhongshan Ophthalmic Center, Sun Yat-sen University, Guangzhou, Guangdong, 510060, China

<sup>2</sup> National Engineering Research Center for Human Tissue Restoration and Reconstruction, South China University of Technology, Guangzhou, Guangdong, 510006, China

<sup>3</sup> School of Materials Science and Engineering, South China University of Technology, Guangzhou, Guangdong, 510641, China

<sup>4</sup> Department of Cataract, Zhongshan Ophthalmic Center, Sun Yat-sen University, Guangzhou, Guangdong, 510060, China

<sup>5</sup> EYEGOOD Medicals Co., Ltd, Zhuhai, Guangdong, 519085, China

# These authors contributed equally to this work.

\* Correspondence and requests for materials should be addressed to L.R. (email: psliren@scut.edu.cn), Y.L. (email: yizhi\_liu@aliyun.com) or M.W. (email: wumingx@mail.sysu.edu.cn)

**Figure S1.** The chemical structures of **(a)** 2-methacryloyloxyethyl phosphorylcholine (MPC), **(b)** methacrylic acid monomer (MAA), and **(c)** P(MPC-MAA).

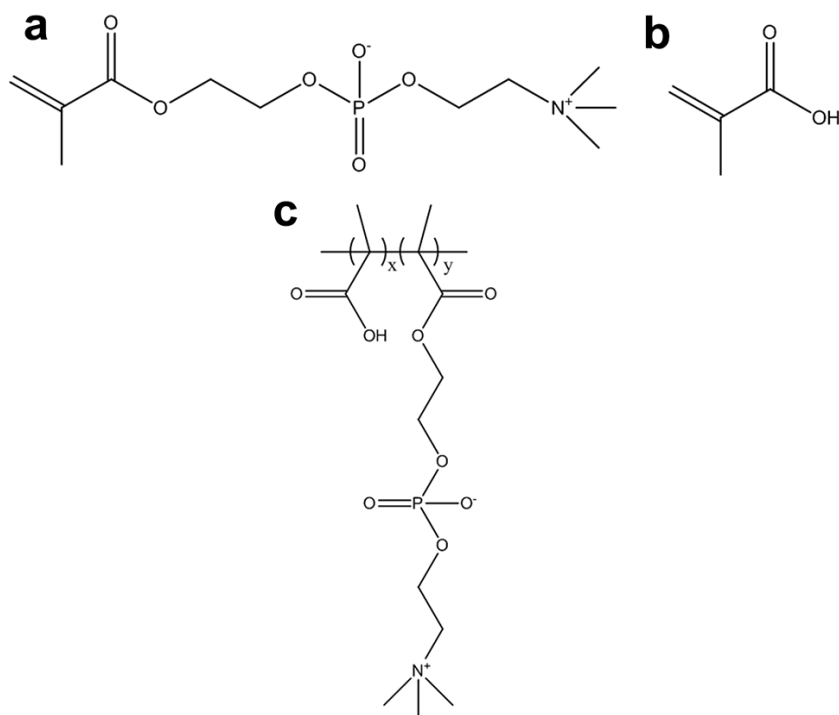

**Figure S2.** Molecular weight (MW) and polydispersity index (PDI) values of P(MPC-MAA) determined by GPC in aqueous sodium nitrate (0.1 M with 0.02 wt % of  $\text{NaN}_3$ ) solution calibrated with poly (ethylene oxide) standards.

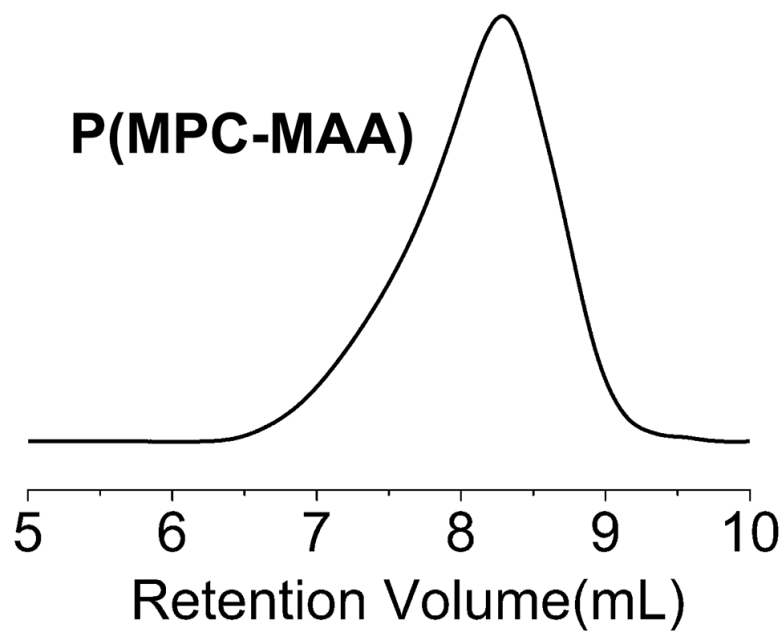

**Figure S3. *IOL-P(MPC-MAA)* reduces postoperative inflammations after cataract surgery. (a)** Representative slit lamp photos indicate the development of IPS in all groups. *IOL* and *IOL-plasma* developed Grade III (a1) and Grade I (a2) IPS, while no IPS was found in most *IOL-P(MPC-MAA)* (a3). Black arrowheads indicate adhesion of iris onto the anterior capsule or IOL surface. **(b)** Representative slit lamp photos indicate the postoperative complications developed in *IOL* and *IOL-plasma* groups, including pupil capture (b1, white arrowhead), severe cortical proliferation (b2, white arrowhead) and IOL displacement (b3, white arrowhead).

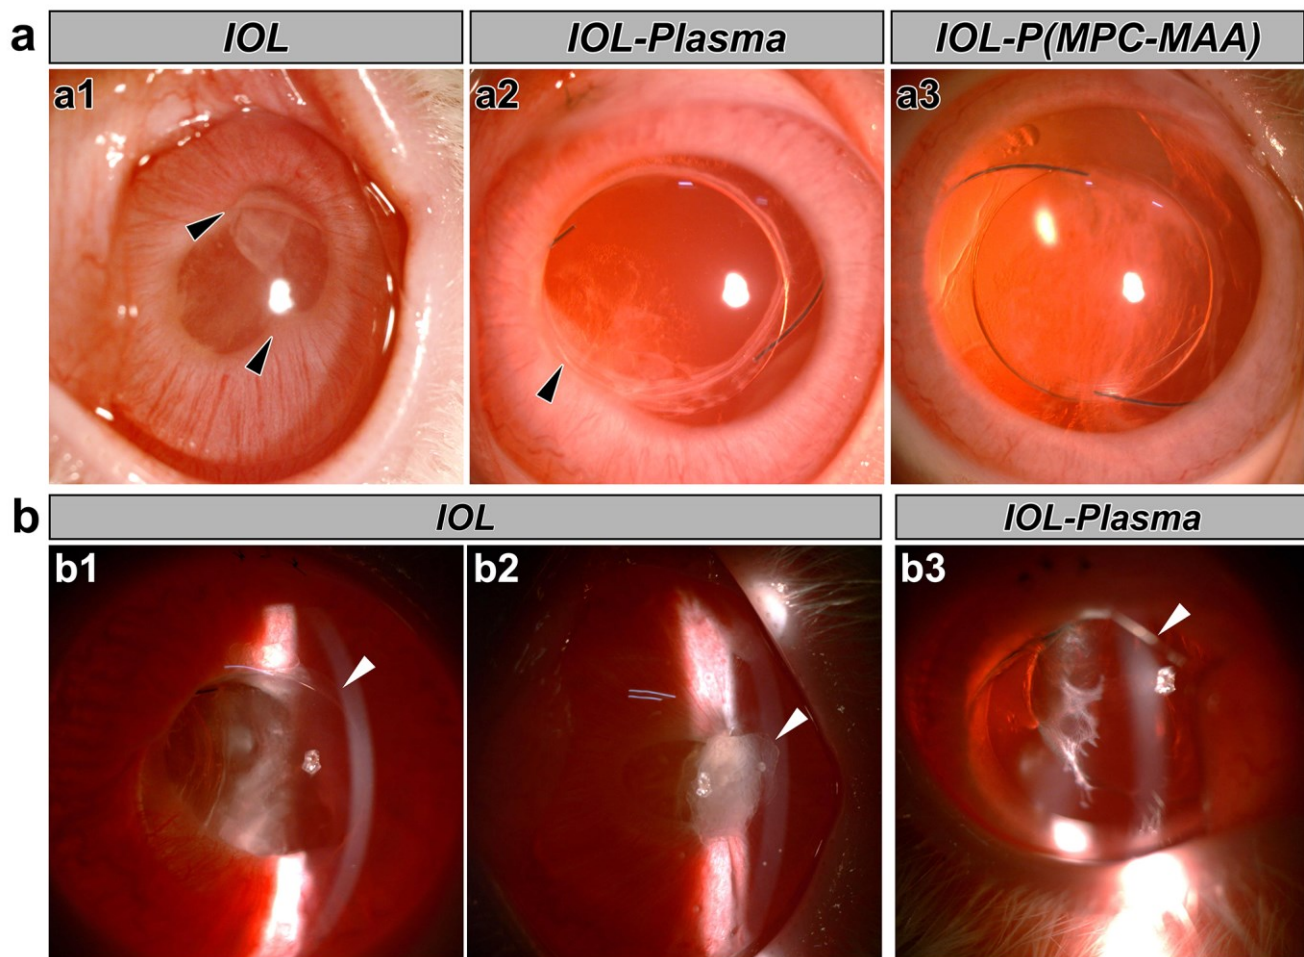

**Figure S4. IOP was comparable in all the groups after cataract surgery.** IOP was measured preoperatively and 1 day, 4 days, 1 week, 2 weeks and 4 weeks postoperatively. n=3.

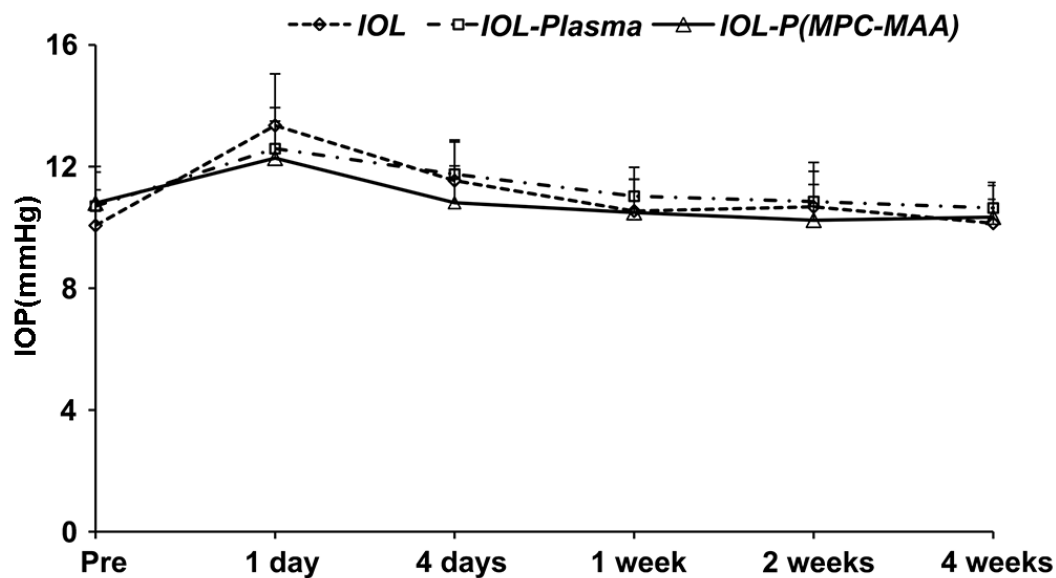

**Figure S5. *IOL-P(MPC-MAA)* reduces EMT of LECs under anterior capsule.** Anterior capsules were stained with Fn (green),  $\alpha$ -SMA (red) and DAPI (blue) in *IOL* and *IOL-P(MPC-MAA)* groups 8 weeks after surgery. Scale bar: 20 $\mu$ m.

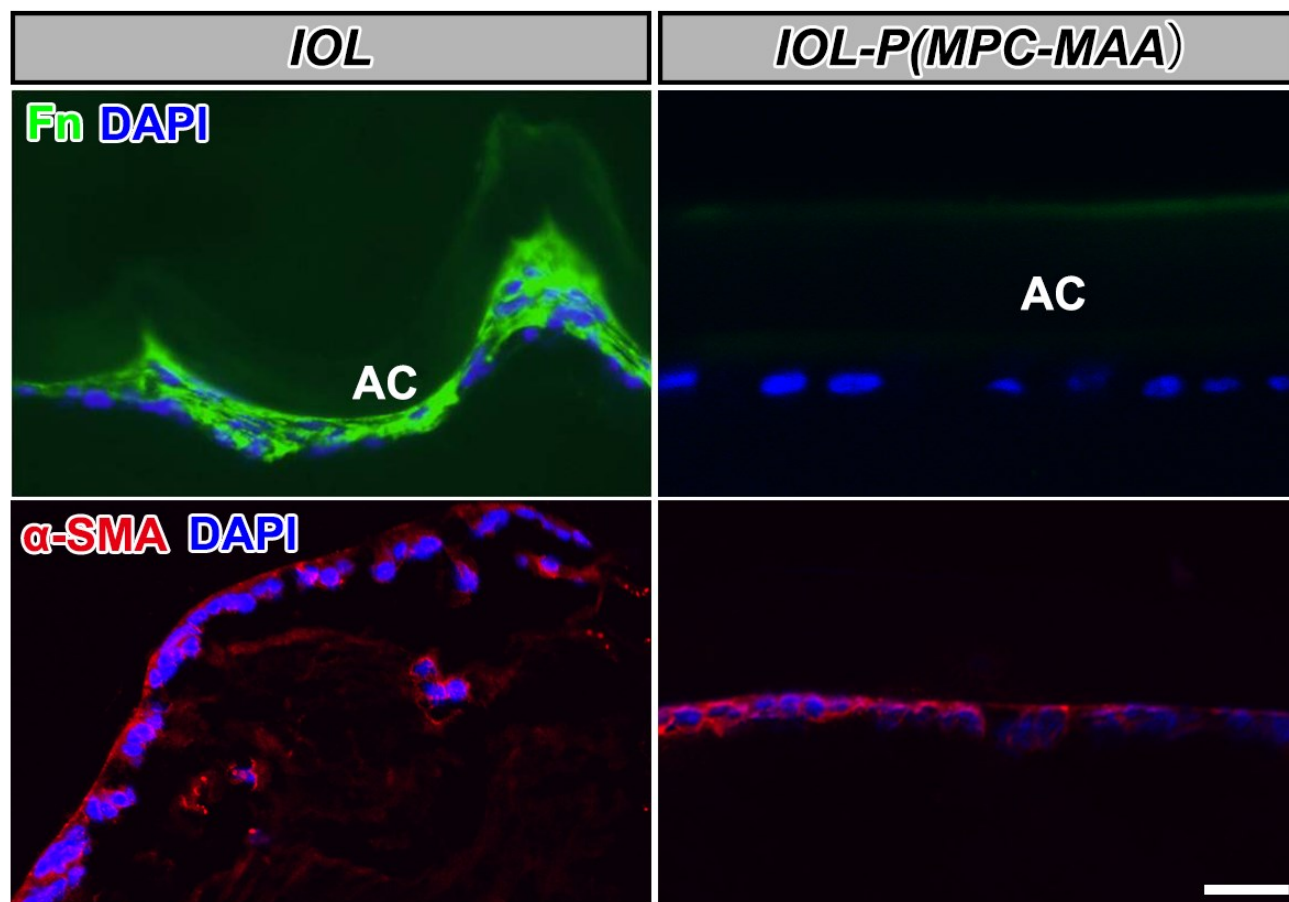

**Figure S6.** Representative TEM images of anterior capsules (**a-b**) or posterior capsules (**c-d**) in *IOL* and *IOL-P(MPC-MAA)* implantation groups 8 weeks after surgery. White arrowheads indicate deposition of ECM. AC: anterior capsule, PC: posterior capsule, n: nucleus.

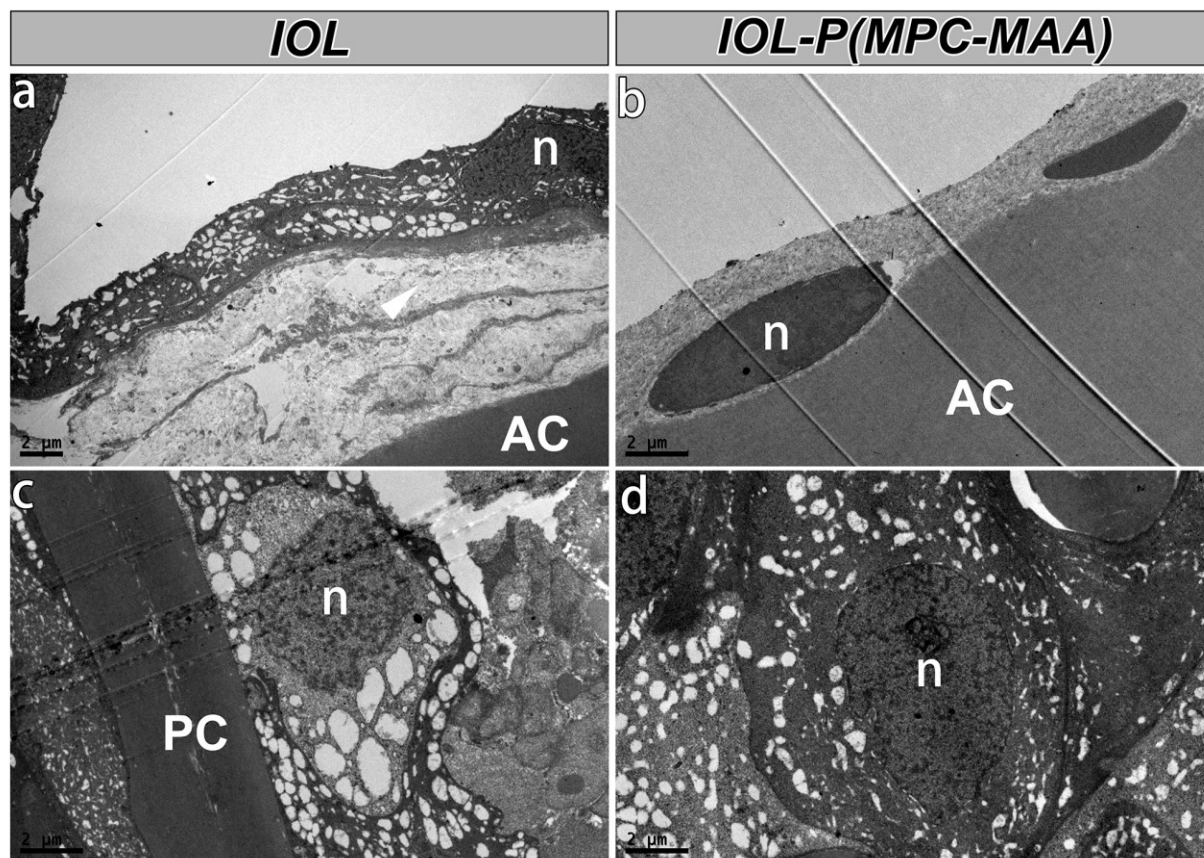

**Figure S7.** Representative fundus images in each group 8 weeks after surgery. Black arrowheads indicate rabbit optic disk.

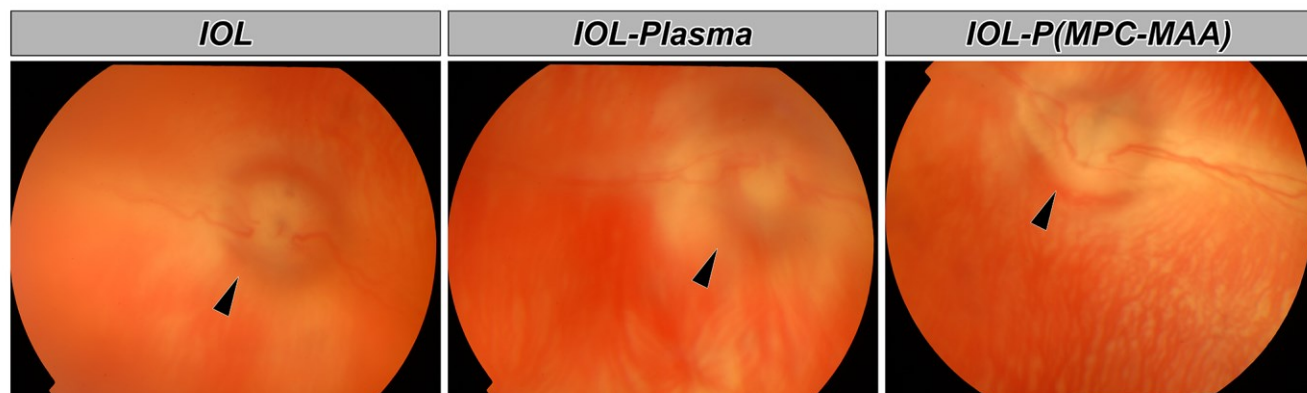

**Table S1. Relative intensities of the N1s peaks of the IOLs.**

|                       | Position(eV) | Relative intensity (%) | Possible element state |
|-----------------------|--------------|------------------------|------------------------|
| <i>IOL</i>            | 399.38       | 100                    | N-C                    |
| <i>IOL-Plasma</i>     | 399.46       | 100                    | N-C                    |
|                       | 399.19       | 26.31                  | N-C                    |
| <i>IOL-P(MPC-MAA)</i> | 400.04       | 17.34                  | N-C(=O)                |
|                       | 401.96       | 56.34                  | N-C(CH <sub>3</sub> )  |

**Table S2. Anterior chamber inflammation assessment after surgery.**

|       | Anterior Chamber Flare         | Anterior Chamber Cells | Iris Posterior Synechiae |
|-------|--------------------------------|------------------------|--------------------------|
| Grade | Flare Count                    | Cell Numbers           | Synechia Range           |
| 0     | no                             | 0                      | no                       |
| I     | Slight (barely detectable)     | 1-15                   | <1 quadrant              |
| II    | Moderate (iris and lens clear) | 16-25                  | ≤2 quadrants             |
| III   | Marked (iris and lens hazy)    | 26-50                  | ≤3 quadrants             |
| IV    | Intense (fibrin clot)          | > 50                   | >3 quadrants             |

Notes: Slit lamp biomicroscopy parameters: 16× magnification; 1×1 mm oblique high-intensity beam; aimed at central cornea in the pupillary axis; focus in the anterior aqueous humor; first count of cells performed at the plane of focus. The scores were evaluated by the same examiner and repeated 3 times.
